# Supplementary material
Source: publisher site journal article supplement (https://www.dovepress.com/get_supplementary_file.php?f=296472.docx)
Supplement: Supplementary file 2 [file get_supplementary_file.php]

**Appendix 1:**

Full list of ATC codes (chemical codes) for medication prescriptions:

| Medications: | ATC codes: |
| --- | --- |
| Statins | C10X |
| Oral glucocorticoids | H02A |
| LABA | R03AC12, R03AC13, R03AC18, R03AC19, R03CC12 |
| LAMA | R03BB04, R03BB05, R03BB06, R03BB07 |
| LABA + ICS combination | R03AK06, R03AK07, R03AK08, R03AK10, R03AK11 |
| LABA + LAMA combination | R03AL03, R03AL04, R03AL05, R03AL06 |
| ICS | R03BA |
